# Supplementary material for: A Tutorial in Bayesian Mediation Analysis With Latent Variables
Source: Atypon-hosted journal article supplement (doi:10.1027/1614-2241/a000177), 2019-10-01
Supplement: 1614-2241_a000177_esm1.pdf [file 1614-2241_a000177_esm1.pdf]

Doi: <https://doi.org/10.1027/1614-2241/a000177>

## Electronic Supplementary Material

### Appendix A

Appendix A1. R2OpenBUGS and coda syntax with diffuse generic priors

| Line | Syntax                                                                              |
|------|-------------------------------------------------------------------------------------|
| 1    | library(R2OpenBUGS)                                                                 |
| 2    | library(readr)                                                                      |
| 3    | DANS_std <- read_csv("E:/DANS_std.csv") # specify location and name of the data set |
| 4    | modelstring <- as.character(")                                                      |
| 5    | model{                                                                              |
| 6    | # Prior distributions                                                               |
| 7    | # Measurement model                                                                 |
| 8    | # Intercepts are not used in the example analysis because x1-y6 are z-scores        |
| 9    | # If your items are not z-scores, remove comments from lines 10-18                  |
| 10   | # nu.x11 ~ dnorm(0, 0.001); # intercept of x1                                       |
| 11   | # nu.x21 ~ dnorm(0, 0.001); # intercept of x2                                       |
| 12   | # nu.x31 ~ dnorm(0, 0.001); # intercept of x3                                       |
| 13   | # nu.y11 ~ dnorm(0, 0.001); # intercept of y1                                       |
| 14   | # nu.y21 ~ dnorm(0, 0.001); # intercept of y2                                       |
| 15   | # nu.y31 ~ dnorm(0, 0.001); # intercept of y3                                       |
| 16   | # nu.y42 ~ dnorm(0, 0.001); # intercept of y4                                       |
| 17   | # nu.y52 ~ dnorm(0, 0.001); # intercept of y5                                       |
| 18   | # nu.y62 ~ dnorm(0, 0.001); # intercept of y6                                       |
| 19   | lam.x21 ~ dnorm(1, 0.001); # loading of x2                                          |
| 20   | lam.x31 ~ dnorm(1, 0.001); # loading of x3                                          |
| 21   | lam.y21 ~ dnorm(1, 0.001); # loading of y2                                          |
| 22   | lam.y31 ~ dnorm(1, 0.001); # loading of y3                                          |
| 23   | lam.y52 ~ dnorm(1, 0.001); # loading of y5                                          |
| 24   | lam.y62 ~ dnorm(1, 0.001); # loading of y6                                          |
| 25   | tau.x1 ~ dgamma(.5, .5); # error precision of x1                                    |
| 26   | tau.x2 ~ dgamma(.5, .5); # error precision of x2                                    |
| 27   | tau.x3 ~ dgamma(.5, .5); # error precision of x3                                    |
| 28   | tau.y1 ~ dgamma(.5, .5); # error precision of y1                                    |
| 29   | tau.y2 ~ dgamma(.5, .5); # error precision of y2                                    |
| 30   | tau.y3 ~ dgamma(.5, .5); # error precision of y3                                    |

```

31 tau.y4 ~ dgamma(.5, .5); # error precision of y4
32 tau.y5 ~ dgamma(.5, .5); # error precision of y5
33 tau.y6 ~ dgamma(.5, .5); # error precision of y6
34 # Structural model
35 phi11 ~ dgamma(.5, .5); # precision of the independent variable
36 psi11 ~ dgamma(.5, .5); # residual precision of the mediator
37 psi22 ~ dgamma(.5, .5); # residual precision of the dependent variable
38 gamma11 ~ dnorm(0, .001); # path between the independent variable and mediator
39 beta21 ~ dnorm(0, .001); # path between the mediator and dependent variable
40 gamma21 ~ dnorm(0, .001); # path between the independent and dependent variables
41 indirect.effect <- gamma11*beta21; # computation of the indirect effect
42 # Conditional probability of the data
43 for(i in 1:n){
44 x1.mean[i] <- 1*Ksi1[i];
45 x2.mean[i] <- lam.x21*Ksi1[i];
46 x3.mean[i] <- lam.x31*Ksi1[i];
47 y1.mean[i] <- 1*Eta1[i];
48 y2.mean[i] <- lam.y21*Eta1[i];
49 y3.mean[i] <- lam.y31*Eta1[i];
50 y4.mean[i] <- 1*Eta2[i];
51 y5.mean[i] <- lam.y52*Eta2[i];
52 y6.mean[i] <- lam.y62*Eta2[i];
53 Ksi1[i] ~ dnorm(0,phi11)
54 x1[i] ~ dnorm(x1.mean[i], tau.x1);
55 x2[i] ~ dnorm(x2.mean[i], tau.x2);
56 x3[i] ~ dnorm(x3.mean[i], tau.x3);
57 y1[i] ~ dnorm(y1.mean[i], tau.y1);
58 y2[i] ~ dnorm(y2.mean[i], tau.y2);
59 y3[i] ~ dnorm(y3.mean[i], tau.y3);
60 y4[i] ~ dnorm(y4.mean[i], tau.y4);
61 y5[i] ~ dnorm(y5.mean[i], tau.y5);
62 y6[i] ~ dnorm(y6.mean[i], tau.y6);
63 Eta1.mean[i] <- gamma11*Ksi1[i];
64 Eta2.mean[i] <- gamma21*Ksi1[i] + beta21*Eta1[i];
65 Eta1[i] ~ dnorm(Eta1.mean[i],psi11)
66 Eta2[i] ~ dnorm(Eta2.mean[i],psi22)
67 }} # closes the model as string

```

```

68 # Write out the BUGS code to a file
69 BUGS.code.file.name <- "Diffuse.txt"
70 write(modelstring, BUGS.code.file.name)
71 write(modelstring, "temp.bug")
72 # Define data to give to BUGS
73 # Change gen_dat to the name of your data set
74 # The code does not accommodate missing values
75 raw.data = DANS_std # specify the name of the data set
76 n <- nrow(raw.data); # calculates the number of cases in the data
77 x1 = raw.data$z_prettig
78 x2 = raw.data$z_sympathiek
79 x3 = raw.data$z_prikkelbaar_r
80 y1 = raw.data$z_aggressive
81 y2 = raw.data$z_ridicules
82 y3 = raw.data$z_impatient
83 y4 = raw.data$z_critizied
84 y5 = raw.data$z_refuse_request
85 y6 = raw.data$z_accept_r
86 data <- list("n", "x1", "x2", "x3", "y1", "y2", "y3", "y4", "y5", "y6")
87 # Define parameters to monitor in BUGS
88 parameters <- c("lam.x21", "lam.x31", "tau.x1", "tau.x2", "tau.x3",
89 "lam.y21", "lam.y31", "tau.y1", "tau.y2", "tau.y3",
90 "lam.y52", "lam.y62", "tau.y4", "tau.y5", "tau.y6",
91 # Remove comments from lines 92 and 93 if your measurement equation has intercepts
92 # "nu.x11", "nu.x21", "nu.x31", "nu.y11", "nu.y21",
93 # "nu.y31", "nu.y42", "nu.y52", "nu.y62",
94 "phi11", "psi11", "psi22",
95 "gamma11", "beta21", "gamma21", "indirect.effect")
96 # Define initial values to give to OpenBUGS for each of 3 chains
97 lam.x2.inits.1 = 0
98 lam.x3.inits.1 = 0.3
99 tau.x1.inits.1 = 2
100 tau.x2.inits.1 = 1
101 tau.x3.inits.1 = .5
102 lam.y2.inits.1 = 0
103 lam.y3.inits.1 = 0.3

```

```

104 tau.y1.inits.1 = 2
105 tau.y2.inits.1 = 1
106 tau.y3.inits.1 = .5
107 lam.y5.inits.1 = 0
108 lam.y6.inits.1 = 0.3
109 tau.y4.inits.1 = 2
110 tau.y5.inits.1 = 1
111 tau.y6.inits.1 = .5
112 # Remove comments from lines 113-121 if your measurement equation has intercepts
113 #nu.x11.inits.1=12
114 #nu.x21.inits.1=13
115 #nu.x31.inits.1=14
116 #nu.y11.inits.1=15
117 #nu.y21.inits.1=16
118 #nu.y31.inits.1=17
119 #nu.y42.inits.1=18
120 #nu.y52.inits.1=19
121 #nu.y62.inits.1=20
122 phi11.inits.1= .5
123 psi11.inits.1= .5
124 psi22.inits.1= .5
125 gamma11.inits.1= .3
126 beta21.inits.1= .4
127 gamma21.inits.1= .7
128 inits1 <- list(lam.x21=lam.x2.inits.1, lam.x31=lam.x3.inits.1,
129 tau.x1=tau.x1.inits.1, tau.x2=tau.x2.inits.1, tau.x3=tau.x3.inits.1,
130 lam.y21=lam.y2.inits.1, lam.y31=lam.y3.inits.1,
131 tau.y1=tau.y1.inits.1, tau.y2=tau.y2.inits.1, tau.y3=tau.y3.inits.1,
132 lam.y52=lam.y5.inits.1, lam.y62=lam.y6.inits.1,
133 tau.y4=tau.y4.inits.1, tau.y5=tau.y5.inits.1, tau.y6=tau.y6.inits.1,
134 # Remove comments from lines 135-137 if your measurement model has intercepts
135 #nu.x11=nu.x11.inits.1, nu.x21=nu.x21.inits.1, nu.x31=nu.x31.inits.1,
136 #nu.y11=nu.y11.inits.1, nu.y21=nu.y21.inits.1, nu.y31=nu.y31.inits.1,
137 # nu.y42=nu.y42.inits.1, nu.y52=nu.y52.inits.1, nu.y62=nu.y62.inits.1,
138 phi11=phi11.inits.1, psi11=psi11.inits.1,
139 psi22=psi22.inits.1, gamma11=gamma11.inits.1, beta21=beta21.inits.1,
140 gamma21=gamma21.inits.1)

```

```

141 lam.x2.inits.2 = 0.3
142 lam.x3.inits.2 = 0.1
143 tau.x1.inits.2 = .5
144 tau.x2.inits.2 = 2
145 tau.x3.inits.2 = 1
146 lam.y2.inits.2 = 0.3
147 lam.y3.inits.2 = 0
148 tau.y1.inits.2 = 1
149 tau.y2.inits.2 = .5
150 tau.y3.inits.2 = 2
151 lam.y5.inits.2 = 0.3
152 lam.y6.inits.2 = 0
153 tau.y4.inits.2 = 1
154 tau.y5.inits.2 = .5
155 tau.y6.inits.2 = 2
156 # Remove comments from lines 157-165 if your measurement equation has intercepts
157 #nu.x11.inits.2=-12
158 #nu.x21.inits.2=-13
159 #nu.x31.inits.2=-14
160 #nu.y11.inits.2=-15
161 #nu.y21.inits.2=-16
162 #nu.y31.inits.2=-17
163 #nu.y42.inits.2=-18
164 #nu.y52.inits.2=-19
165 #nu.y62.inits.2=-20
166 psi11.inits.2= 1
167 psi22.inits.2= 1
168 gamma11.inits.2= .7
169 beta21.inits.2= .3
170 gamma21.inits.2= .4
171 inits2 <- list(lam.x21=lam.x2.inits.2, lam.x31=lam.x3.inits.2,
172 tau.x1=tau.x1.inits.2, tau.x2=tau.x2.inits.2, tau.x3=tau.x3.inits.2,
173 lam.y21=lam.y2.inits.2, lam.y31=lam.y3.inits.2,
174 tau.y1=tau.y1.inits.2, tau.y2=tau.y2.inits.2, tau.y3=tau.y3.inits.2,
175 lam.y52=lam.y5.inits.2, lam.y62=lam.y6.inits.2,
176 tau.y4=tau.y4.inits.2, tau.y5=tau.y5.inits.2, tau.y6=tau.y6.inits.2,
177 # Remove comments from lines 178-180 if your measurement model has intercepts

```

```

178 #nu.x11=nu.x11.inits.2, nu.x21=nu.x21.inits.2, nu.x31=nu.x31.inits.2,
179 #nu.y11=nu.y11.inits.2, nu.y21=nu.y21.inits.2, nu.y31=nu.y31.inits.2,
180 #nu.y42=nu.y42.inits.2, nu.y52=nu.y52.inits.2, nu.y62=nu.y62.inits.2,
181 phi11=phi11.inits.2, psi11=psi11.inits.2,
182 psi22=psi22.inits.2, gamma11=gamma11.inits.2, beta21=beta21.inits.2,
183 gamma21=gamma21.inits.2)
184 lam.x2.inits.3 = 0.01
185 lam.x3.inits.3 = 0
186 tau.x1.inits.3 = 1
187 tau.x2.inits.3 = .5
188 tau.x3.inits.3 = 2
189 lam.y2.inits.3 = 0.3
190 lam.y3.inits.3 = 0.7
191 tau.y1.inits.3 = 2.4
192 tau.y2.inits.3 = 1.7
193 tau.y3.inits.3 = .2
194 lam.y5.inits.3 = 0.3
195 lam.y6.inits.3 = 3
196 tau.y4.inits.3 = 2.5
197 tau.y5.inits.3 = 1.7
198 tau.y6.inits.3 = .85
199 # Remove comments from lines 200-208 if your measurement equation has intercepts
200 #nu.x11.inits.3=0
201 #nu.x21.inits.3=0
202 #nu.x31.inits.3=0
203 #nu.y11.inits.3=0
204 #nu.y21.inits.3=0
205 #nu.y31.inits.3=0
206 #nu.y42.inits.3=0
207 #nu.y52.inits.3=0
208 #nu.y62.inits.3=0
209 psi11.inits.3= .75
210 psi22.inits.3= 3.5
211 gamma11.inits.3= 2.3
212 beta21.inits.3= 1.4
213 gamma21.inits.3= .2
214 inits3 <- list(lam.x21=lam.x2.inits.3, lam.x31=lam.x3.inits.3,

```

```

215 tau.x1=tau.x1.inits.3, tau.x2=tau.x2.inits.3, tau.x3=tau.x3.inits.3,
216 lam.y2=lam.y2.inits.3, lam.y3=lam.y3.inits.3,
217 tau.y1=tau.y1.inits.3, tau.y2=tau.y2.inits.3, tau.y3=tau.y3.inits.3,
218 lam.y52=lam.y5.inits.3, lam.y62=lam.y6.inits.3,
219 tau.y4=tau.y4.inits.3, tau.y5=tau.y5.inits.3, tau.y6=tau.y6.inits.3,
220 # Remove comments from lines 221-223 if your measurement model has intercepts
221 #nu.x11=nu.x11.inits.3, nu.x21=nu.x21.inits.3, nu.x31=nu.x31.inits.3,
222 #nu.y11=nu.y11.inits.3, nu.y21=nu.y21.inits.3, nu.y31=nu.y31.inits.3,
223 #nu.y42=nu.y42.inits.3, nu.y52=nu.y52.inits.3, nu.y62=nu.y62.inits.3,
224 phi11=phi11.inits.3, psi11=psi11.inits.3,
225 psi22=psi22.inits.3, gamma11=gamma11.inits.3, beta21=beta21.inits.3,
226 gamma21=gamma21.inits.3)
227 inits <- list(inits1, inits2, inits3)
228 # Choose
229 # the number of chains
230 # the number of iterations to burn-in,
231 # the number of iterations to thin by,
232 # the total number of iterations
233 n.chains = 3
234 n.burnin = 25000
235 n.thin = 1
236 n.iters.total.per.chain = 50000
237 # Call OpenBUGS to run the model
238 model.in.openbugs <- bugs(
239 data=data,
240 inits=inits,
241 parameters.to.save=parameters,
242 model.file=BUGS.code.file.name,
243 n.chains=n.chains,
244 n.iter=n.iters.total.per.chain,
245 n.burnin=n.burnin,
246 n.thin=n.thin,
247 debug=FALSE,
248 codaPkg=TRUE,
249 OpenBUGS.pgm=NULL,
250 working.directory=getwd(),

```

```

251 clearWD=FALSE, useWINE=FALSE, WINE=NULL,
252 newWINE=TRUE, WINEPATH=NULL, bugs.seed=1,
253 DIC=TRUE )
254 # This code reads in the draws from BUGS
255 library(coda)
256 coda.file.names <- model.in.openbugs
257 draws.from.bugs <- read.bugs(coda.file.names)
258 # Obtain trace plots and density plots and the PSRF
259 plot(draws.from.bugs, trace=TRUE, density = TRUE)
260 gelman.diag(draws.from.bugs)
261 # Combine all chains
262 coda.options(combine.stats=TRUE, combine.plots=TRUE)
263 # Summarize the posteriors
264 # Mean, median, and equal-tail credibility intervals
265 summary(draws.from.bugs)
266 # HPD intervals
267 str(draws.from.bugs)
268 draws.to.analyze.as.one.list <- as.mcmc(do.call(rbind,draws.from.bugs))
269 str(draws.to.analyze.as.one.list)
270 HPDinterval(draws.to.analyze.as.one.list, prob=.95)
271 # DIC
272 log.file<-paste(getwd(), "/log.txt", sep="")
273 bugs.log(log.file)
274 # Probability that the indirect effect is greater than a meaningful value ("criterion")
275 criterion<- 0
276 draws.to.analyze.as.one.list <- as.mcmc(do.call(rbind,draws.from.bugs))
277 all.draws<-as.data.frame(draws.to.analyze.as.one.list)
278 ind.draws<-all.draws$indirect.effect
279 prob.greater.than.criterion<-sum(ind.draws >= criterion )/length(ind.draws)

```

---



## Appendix A2. Changes in R2OpenBUGS code to specify diffuse conjugate priors

---

```
6 # Prior distributions
7 # Measurement model
8 # Intercepts are not used in the example analysis because x1-y6 are z-scores
9 # If your items are not z-scores, remove comments from lines 10-18
10 # nu.x11 ~ dnorm(0, 0.001); # intercept of x1
11 # nu.x21 ~ dnorm(0, 0.001); # intercept of x2
12 # nu.x31 ~ dnorm(0, 0.001); # intercept of x3
13 # nu.y11 ~ dnorm(0, 0.001); # intercept of y1
14 # nu.y21 ~ dnorm(0, 0.001); # intercept of y2
15 # nu.y31 ~ dnorm(0, 0.001); # intercept of y3
16 # nu.y42 ~ dnorm(0, 0.001); # intercept of y4
17 # nu.y52 ~ dnorm(0, 0.001); # intercept of y5
18 # nu.y62 ~ dnorm(0, 0.001); # intercept of y6
19 lam.x21 ~ dnorm(1, tau.x2); # loading of x2
20 lam.x31 ~ dnorm(1, tau.x3); # loading of x3
21 lam.y21 ~ dnorm(1, tau.y2); # loading of y2
22 lam.y31 ~ dnorm(1, tau.y3); # loading of y3
23 lam.y52 ~ dnorm(1, tau.y5); # loading of y5
24 lam.y62 ~ dnorm(1, tau.y6); # loading of y6
25 tau.x1 ~ dgamma(.5, .5); # error precision of x1
26 tau.x2 ~ dgamma(.5, .5); # error precision of x2
27 tau.x3 ~ dgamma(.5, .5); # error precision of x3
28 tau.y1 ~ dgamma(.5, .5); # error precision of y1
29 tau.y2 ~ dgamma(.5, .5); # error precision of y2
30 tau.y3 ~ dgamma(.5, .5); # error precision of y3
31 tau.y4 ~ dgamma(.5, .5); # error precision of y4
32 tau.y5 ~ dgamma(.5, .5); # error precision of y5
33 tau.y6 ~ dgamma(.5, .5); # error precision of y6
34 # Structural model
35 phi11 ~ dgamma(.5, .5); # precision of the independent variable
36 psi11 ~ dgamma(.5, .5); # residual precision of the mediator
37 psi22 ~ dgamma(.5, .5); # residual precision of the dependent variable
38 gamma11 ~ dnorm(0, phi11); # path between the independent variable and mediator
39 beta21 ~ dnorm(0, psi11); # path between the mediator and dependent variable
40 gamma21 ~ dnorm(0, psi22); # path between the independent and dependent variables
```

---

### Appendix A3. Changes in R2OpenBUGS code to specify informative priors

---

```
6 # Prior distributions
7 # Measurement model
8 # Intercepts are not used in the example analysis because x1-y6 are z-scores
9 # If your items are not z-scores, remove comments from lines 10-18
10 # nu.x11 ~ dnorm(0, 0.444); # intercept of x1
11 # nu.x21 ~ dnorm(0, 0.444); # intercept of x2
12 # nu.x31 ~ dnorm(0, 0.444); # intercept of x3
13 # nu.y11 ~ dnorm(0, 0.444); # intercept of y1
14 # nu.y21 ~ dnorm(0, 0.444); # intercept of y2
15 # nu.y31 ~ dnorm(0, 0.444); # intercept of y3
16 # nu.y42 ~ dnorm(0, 0.444); # intercept of y4
17 # nu.y52 ~ dnorm(0, 0.444); # intercept of y5
18 # nu.y62 ~ dnorm(0, 0.444); # intercept of y6
19 lam.x21 ~ dnorm(1, 0.444); # loading of x2
20 lam.x31 ~ dnorm(1, 0.444); # loading of x3
21 lam.y21 ~ dnorm(1, 0.444); # loading of y2
22 lam.y31 ~ dnorm(1, 0.444); # loading of y3
23 lam.y52 ~ dnorm(1, 0.444); # loading of y5
24 lam.y62 ~ dnorm(1, 0.444); # loading of y6
25 tau.x1 ~ dgamma(.5, .5); # error precision of x1
26 tau.x2 ~ dgamma(.5, .5); # error precision of x2
27 tau.x3 ~ dgamma(.5, .5); # error precision of x3
28 tau.y1 ~ dgamma(.5, .5); # error precision of y1
29 tau.y2 ~ dgamma(.5, .5); # error precision of y2
30 tau.y3 ~ dgamma(.5, .5); # error precision of y3
31 tau.y4 ~ dgamma(.5, .5); # error precision of y4
32 tau.y5 ~ dgamma(.5, .5); # error precision of y5
33 tau.y6 ~ dgamma(.5, .5); # error precision of y6
34 # Structural model
35 phi11 ~ dgamma(.5, .5); # precision of the independent variable
36 psi11 ~ dgamma(.5, .5); # residual precision of the mediator
37 psi22 ~ dgamma(.5, .5); # residual precision of the dependent variable
38 gamma11 ~ dnorm(0, 0.444); # path between the independent variable and mediator
```

```

39  beta21 ~ dnorm(0, 0.444); # path between the mediator and dependent variable
40  gamma21 ~ dnorm(0, 0.444); # path between the independent and dependent variables

```

---

## Appendix B1. Mplus syntax with diffuse generic priors

| Line | Syntax                                                                  |
|------|-------------------------------------------------------------------------|
| 1    | TITLE: Bayesian analysis with diffuse priors                            |
| 2    | DATA: FILE IS DANS_std_nonames.csv;                                     |
| 3    | VARIABLE: NAMES ARE z_prettig z_sympathiek z_prikkelbaar_r z_aggressive |
| 4    | z_ridicules z_impatient z_critizied z_refuse_request z_accept_r;        |
| 5    | USEVARIABLES ARE ALL;                                                   |
| 6    | analysis:                                                               |
| 7    | estimator = bayes;                                                      |
| 8    | chains = 3;                                                             |
| 9    | proc = 2;                                                               |
| 10   | biter = 25000;                                                          |
| 11   | fbiter = 50000;                                                         |
| 12   | thin = 1;                                                               |
| 13   | model:                                                                  |
| 14   | ksi1 BY x1@1;                                                           |
| 15   | ksi1 BY x2*3(lamx21);                                                   |
| 16   | ksi1 BY x3*5 (lamx31);                                                  |
| 17   | eta1 BY y1@1;                                                           |
| 18   | eta1 BY y2*2 (lamy21);                                                  |
| 19   | eta1 BY y3*9 (lamy31);                                                  |
| 20   | eta2 BY y4@1;                                                           |
| 21   | eta2 BY y5*4 (lamy52);                                                  |
| 22   | eta2 BY y6*7 (lamy62);                                                  |
| 23   | eta1 ON ksi1*4 (gamma11);                                               |
| 24   | eta2 ON ksi1*3 (gamma21);                                               |
| 25   | eta2 ON eta1*2 (beta21);                                                |
| 26   | [ x1@0 ]; [ x2@0 ]; [ x3@0 ];                                           |
| 27   | [ y1@0 ]; [ y2@0 ]; [ y3@0 ];                                           |
| 28   | [ y4@0 ]; [ y5@0 ]; [ y6@0 ];                                           |
| 29   | [ ksi1@0 ]; [ eta1@0 ]; [ eta2@0 ];                                     |
| 30   | ! Assigning starting values for each parameter                          |

```

31  x1*7 (varx1);
32  x2*7 (varx2);
33  x3*7 (varx3);
34  y1*7 (vary1);
35  y2*7 (vary2);
36  y3*7 (vary3);
37  y4*7 (vary4);
38  y5*7 (vary5);
39  y6*7 (vary6);
40  ksi1*7 (phi11);
41  eta1*7 (psi11);
42  eta2*7 (psi22);
43  ! Computing the indirect effect
44  MODEL CONSTRAINT:
45  NEW(ind);
46  ind=gamma11*beta21;
47  !Assigning prior distributions
48  model priors:
49  lamx21 ~ N(1,1000); ! loading of x2
50  lamx31 ~ N(1,1000); ! loading of x3
51  lamy21 ~ N(1,1000); ! loading of y2
52  lamy31 ~ N(1,1000); ! loading of y3
53  lamy52 ~ N(1,1000); ! loading of y5
54  lamy62 ~ N(1,1000); ! loading of y6
55  varx1 ~ IG(.5,.5); ! error variance of x1
56  varx2 ~ IG(.5,.5); ! error variance of x2
57  varx3 ~ IG(.5,.5); ! error variance of x3
58  vary1 ~ IG(.5,.5); ! error variance of y1
59  vary2 ~ IG(.5,.5); ! error variance of y2
60  vary3 ~ IG(.5,.5); ! error variance of y3
61  vary4 ~ IG(.5,.5); ! error variance of y4
62  vary5 ~ IG(.5,.5); ! error variance of y5
63  vary6 ~ IG(.5,.5); ! error variance of y6
64  gamma11 ~ N(0,1000); ! path between the independent variable and mediator
65  gamma21 ~ N(0,1000); ! path between the independent and dependent variables
66  beta21 ~ N(0,1000); ! path between the mediator and dependent variable

```

```

67 phi11 ~ IG(.5,.5); ! variance of the independent variable
68 psi11 ~ IG(.5,.5); ! residual variance of the mediator
69 psi22 ~ IG(.5,.5); ! residual variance of the dependent variable
70 output: tech1 tech8 stdy svalues cint(hpd);
71 plot: type = plot2;
72 savedata: bparameters=mplus_results_diffuse.txt; !export draws

```

---

## Appendix B2. Mplus syntax with informative priors

| Line | Syntax                                                                  |
|------|-------------------------------------------------------------------------|
| 1    | TITLE: Bayesian analysis with informative priors                        |
| 2    | DATA: FILE IS DANS_std_nonames.csv;                                     |
| 3    | VARIABLE: NAMES ARE z_prettig z_sympathiek z_prikkelbaar_r z_aggressive |
| 4    | z_ridicules z_impatient z_critizied z_refuse_request z_accept_r;        |
| 5    | USEVARIABLES ARE ALL;                                                   |
| 6    | analysis:                                                               |
| 7    | estimator = bayes;                                                      |
| 8    | chains = 3;                                                             |
| 9    | proc = 2;                                                               |
| 10   | biter = 25000;                                                          |
| 11   | fbiter = 50000;                                                         |
| 12   | thin = 1;                                                               |
| 13   | model:                                                                  |
| 14   | ksi1 BY x1@1;                                                           |
| 15   | ksi1 BY x2*3(lamx21);                                                   |
| 16   | ksi1 BY x3*5 (lamx31);                                                  |
| 17   | eta1 BY y1@1;                                                           |
| 18   | eta1 BY y2*2 (lamy21);                                                  |
| 19   | eta1 BY y3*9 (lamy31);                                                  |
| 20   | eta2 BY y4@1;                                                           |
| 21   | eta2 BY y5*4 (lamy52);                                                  |
| 22   | eta2 BY y6*7 (lamy62);                                                  |
| 23   | eta1 ON ksi1*4 (gamma11);                                               |
| 24   | eta2 ON ksi1*3 (gamma21);                                               |
| 25   | eta2 ON eta1*2 (beta21);                                                |

```

26 [x1@0]; [x2@0]; [x3@0];
27 [y1@0]; [y2@0]; [y3@0];
28 [y4@0]; [y5@0]; [y6@0];
29 [ksi1@0]; [eta1@0]; [eta2@0];
30 ! Assigning starting values for each parameter
31 x1*7 (varx1);
32 x2*7 (varx2);
33 x3*7 (varx3);
34 y1*7 (vary1);
35 y2*7 (vary2);
36 y3*7 (vary3);
37 y4*7 (vary4);
38 y5*7 (vary5);
39 y6*7 (vary6);
40 ksi1*7 (phi11);
41 eta1*7 (psi11);
42 eta2*7 (psi22);
43 ! Computing the indirect effect
44 MODEL CONSTRAINT:
45 NEW(ind);
46 ind=gamma11*beta21;
47 !Assigning prior distributions
48 model priors:
49 lamx21 ~ N(1,2.25); ! loading of x2
50 lamx31 ~ N(1,2.25); ! loading of x3
51 lamy21 ~ N(1,2.25); ! loading of y2
52 lamy31 ~ N(1,2.25); ! loading of y3
53 lamy52 ~ N(1,2.25); ! loading of y5
54 lamy62 ~ N(1,2.25); ! loading of y6
55 varx1 ~ IG(.5,.5); ! error variance of x1
56 varx2 ~ IG(.5,.5); ! error variance of x2
57 varx3 ~ IG(.5,.5); ! error variance of x3
58 vary1 ~ IG(.5,.5); ! error variance of y1
59 vary2 ~ IG(.5,.5); ! error variance of y2
60 vary3 ~ IG(.5,.5); ! error variance of y3
61 vary4 ~ IG(.5,.5); ! error variance of y4

```

```
62 vary5 ~ IG(.5,.5); ! error variance of y5
63 vary6 ~ IG(.5,.5); ! error variance of y6
64 gamma11 ~ N(1,2.25); ! path between the independent variable and mediator
65 gamma21 ~ N(1,2.25); ! path between the independent and dependent variables
66 beta21 ~ N(1,2.25); ! path between the mediator and dependent variable
67 phi11 ~ IG(.5,.5); ! variance of the independent variable
68 psi11 ~ IG(.5,.5); ! residual variance of the mediator
69 psi22 ~ IG(.5,.5); ! residual variance of the dependent variable
70 output: tech1 tech8 stdy svalues cint(hpd);
71 plot: type = plot2;
72 savedata: bparameters=mplus_results_informative.txt; !export draws
```

---
